# Supplementary material for: Next move in movement disorders (NEMO): developing a computer-aided classification tool for hyperkinetic movement disorders
Source: PubMed Central journal article supplement — BMJ Open. 2021 Oct 11;11(10):e055068. doi: 10.1136/bmjopen-2021-055068 (PMC8506849; doi:10.1136/bmjopen-2021-055068), 2021-10-11
Supplement: bmjopen-2021-055068.reviewer_comments.pdf [file bmjopen-2021-055068.reviewer_comments.pdf]

## PEER REVIEW HISTORY

BMJ Open publishes all reviews undertaken for accepted manuscripts. Reviewers are asked to complete a checklist review form (<http://bmjopen.bmj.com/site/about/resources/checklist.pdf>) and are provided with free text boxes to elaborate on their assessment. These free text comments are reproduced below.

## ARTICLE DETAILS

|                            |                                                                                                                                                                                                   |
|----------------------------|---------------------------------------------------------------------------------------------------------------------------------------------------------------------------------------------------|
| <b>TITLE (PROVISIONAL)</b> | The next move in movement disorders (NEMO): developing a computer aided classification tool for hyperkinetic movement disorders.                                                                  |
| <b>AUTHORS</b>             | van der Stouwe, A.M.; Tuitert, Inge; Giotis, Ioannis; Calon, Joost; Gannamani, Rahul; Dalenberg, Jelle; van der Veen, Sterre; Klamer, M.R. (Marrit); Telea, A.C. (Alex); Tijssen, M.A.J. (Marina) |

This article was not externally reviewed at BMJ Open. Protocols that have been independently assessed prior to submission to BMJ Open are usually fast-tracked to publication on the grounds that further substantial changes will not be possible. This independent assessment will usually be external, independent review for both a substantial grant award from a non-commercial or government funder and ethics approval.
